# Supplementary material for: A highly sensitive and recyclable SERS substrate based on Ag-nanoparticle-decorated ZnO nanoflowers in ordered arrays
Source: Royal Society of Chemistry journal article supplement (doi:10.1039/c4dt03596h), 2015-01-01
Supplement: c4dt03596h1.pdf [file c4dt03596h1.pdf]

### Supporting Information

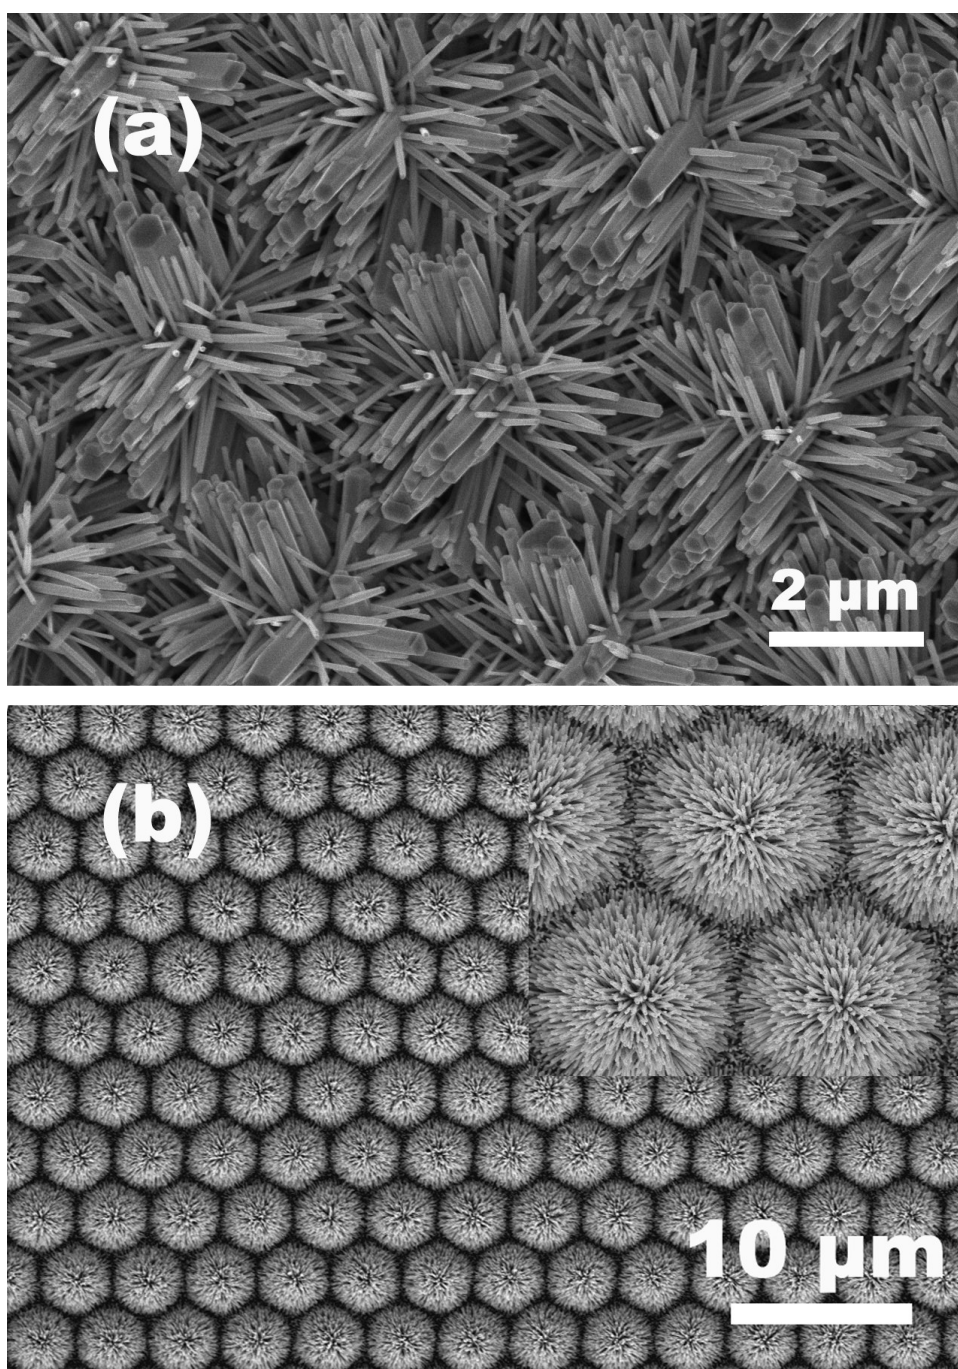

Figure S1 SEM images of ZnO nanoflower arrays, (a) using a ZnO seed layer directly deposited on the patterned sapphire substrate by magnetron sputtering, (b) using a ZnO seed layer deposited by magnetron sputtering after SiO<sub>2</sub> layer was deposited.

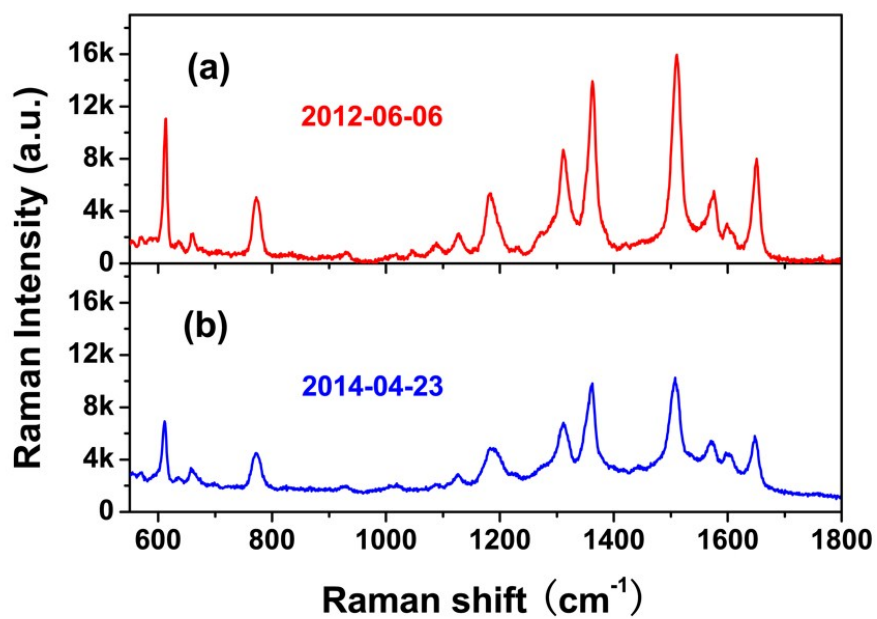

Figure S2 Raman spectra of  $10^{-6}$  M R6G using the SERS substrates (a) as-prepared in 2012-06-16 (b) aged for  $\sim 2$  years in 2014-04-23;
